# Supplementary material for: Epidemiology and Characteristics of Gastric Carcinoma in Childhood—An Analysis of Data from Population-Based and Clinical Cancer Registries
Source: MDPI journal article supplement (doi:10.3390/cancers15010317), 2023-01-03
Supplement: s1 [file s1]

**Table S1.** ZfKD – reports and follow-up received by state registries.

| State registry                | Active reporting  | Reported Follow-up until |
|-------------------------------|-------------------|--------------------------|
| Schleswig-Holstein            | 2000 – 2017       | 31.12.2017               |
| Hamburg                       | 2000 – 2017       | 31.12.2017               |
| Lower Saxony                  | 2003 – 2017       | 31.12.2017               |
| Bremen                        | 2000 – 2017       | 31.12.2017               |
| North Rhine-Westphalia        | 2006 – 2017       | 31.12.2017               |
| <i>Subregistries</i>          | <i>Dusseldorf</i> | 2006 – 2017              |
|                               | <i>Cologne</i>    | 2006 – 2017              |
|                               | <i>Münster</i>    | 2000 – 2017              |
|                               | <i>Detmold</i>    | 2006 – 2017              |
|                               | <i>Arnsberg</i>   | 2006 – 2017              |
| Hesse                         | 2007 – 2016       | 31.12.2016               |
| Rhineland-Palatinate          | 2000 – 2016       | 31.12.2016               |
| Baden-Württemberg             | 2009 – 2017       | 31.12.2017               |
| Bavaria                       | 2002 - 2017       | 31.12.2017               |
| Saarland                      | 2000 – 2017       | 31.12.2017               |
| Berlin                        | 2000 – 2015       | 31.12.2015               |
| Brandenburg                   | 2000 – 2015       | 31.12.2015               |
| Mecklenburg-Western Pomerania | 2000 – 2015       | 31.12.2015               |
| Saxony                        | 2000 – 2015       | 31.12.2015               |
| Saxony-Anhalt                 | 2000 – 2015       | 31.12.2015               |
| Thuringia                     | 2000 – 2015       | 31.12.2015               |

**Table S2.** TNM staging for gastric carcinoma according to the American Joint Committee on Cancer (AJCC), 8th edition [18].

| Stage | T          | N     | M  |
|-------|------------|-------|----|
| IA    | T1         | N0    | M0 |
| IB    | T1         | N1    | M0 |
|       | T2         | N0    | M0 |
| IIA   | T1         | N2    | M0 |
|       | T2         | N1    | M0 |
|       | T3         | N0    | M0 |
| IIB   | T1         | N3a   | M0 |
|       | T2         | N2    | M0 |
|       | T3         | N1    | M0 |
|       | T4a        | N0    | M0 |
| IIIA  | T2         | N3a   | M0 |
|       | T3, 4a     | N2    | M0 |
|       | T4a        | N1    | M0 |
|       | T4b        | N0    | M0 |
| IIIB  | T1, 2      | N3b   | M0 |
|       | T3, 4a     | N3a   | M0 |
|       | T4b        | N1, 2 | M0 |
| IIIC  | T3, 4a, 4b | N3b   | M0 |
|       | T4b        | N3a   | M0 |
| IV    | any T      | any N | M1 |
